# Supplementary material for: Gene Expression and Chromatin Modifications Associated with Maize Centromeres
Source: Oxford University Press journal article supplement (doi:10.1534/g3.115.022764), 2015-12-03
Supplement: 022764_figures4.pdf [file 022764_figures4.pdf]

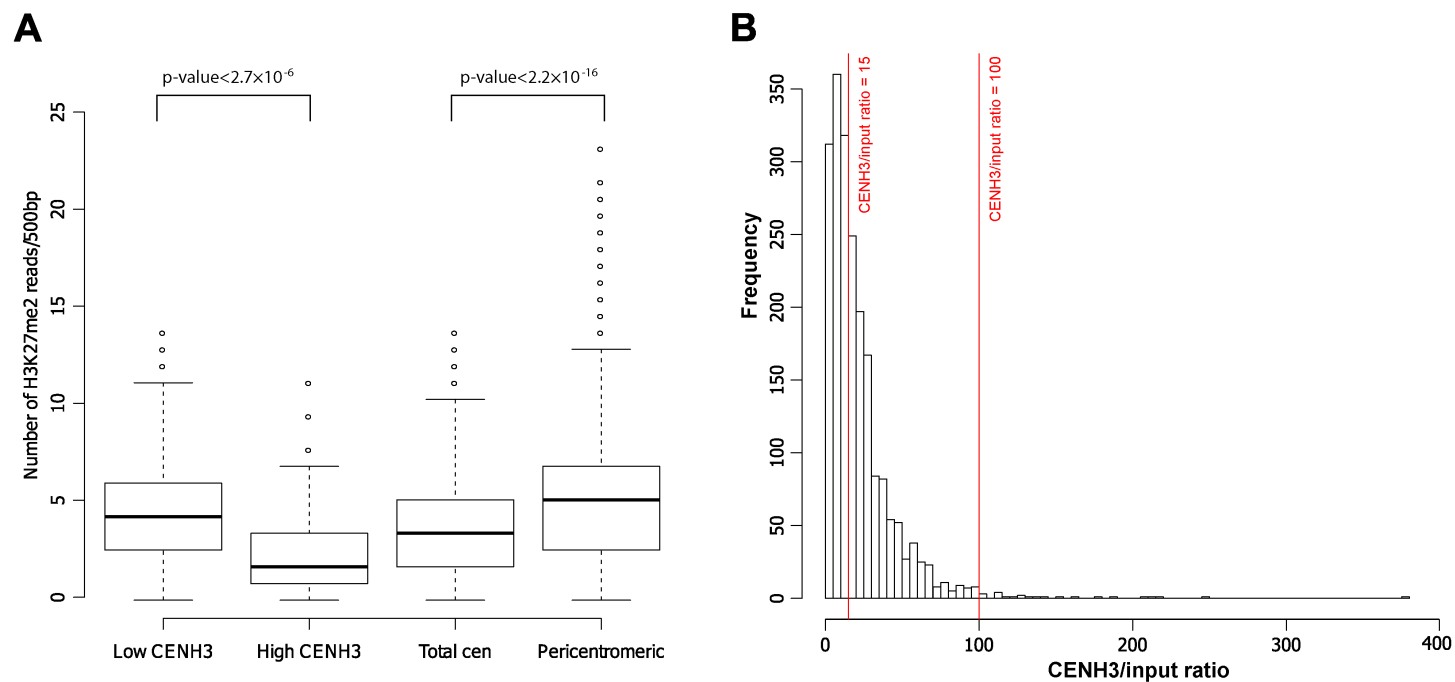

**Figure S4.** Association between CENH3 occupancy and H3K27me2 modification. **(A)** H3K27me2 read numbers in 500 bp-windows in centromeric and pericentromeric regions. “Low CENH3”: windows with CENH3/input ratio less than 15. “High CENH3”: windows with CENH3/input ratio more than 100. “Total cen”: all windows in centromeres. “Pericentromeric”: windows in pericentromeric regions (5 Mb flanking both sides of the centromeric regions). There are significant differences of H3K27me2 enrichment between “Low CENH3” and “High CENH3” and between “Total cen” and “Pericentromeric”. **(B)** Distribution of CENH3/input ratio of 500 bp-windows in centromeres.
