# Supplementary material for: Gene Expression and Chromatin Modifications Associated with Maize Centromeres
Source: Oxford University Press journal article supplement (doi:10.1534/g3.115.022764), 2015-12-03
Supplement: 022764_tables1.pdf [file 022764_tables1.pdf]

**Table S1.** DNA primers used in qRT-PCR analysis of maize centromeric genes

| Genes         | Primer Sequences                                                      | Amplicon sizes (bp) |
|---------------|-----------------------------------------------------------------------|---------------------|
| <i>Actin</i>  | F: 5' AAGTACCCGATTGAGCATGGCA 3'<br>R: 5' CATCACAATACCAGTTGTTTCGCCC 3' | 258                 |
| GRMZM2G040843 | F: 5' CAAGGATGCCATGAATAACGC 3'<br>R: 5' GGTATGAAGTCCCGAATAAACACC 3'   | 270                 |
| GRMZM2G175425 | F: 5' CTCATCGGTTTCGCGGTTGTG 3'<br>R: 5' CTCAGTGAAGCTGGCAAACGGT 3'     | 241                 |
| GRMZM2G137715 | F: 5' TCCACGAGTACGCAGACGACT 3'<br>R: 5' CATCCTCCACAACTTGACATAG 3'     | 204                 |
| GRMZM5G820434 | F: 5' CTGACATCCATGGTTGGGGACAG 3'<br>R: 5' CTGAGCTCTCTCTCCCATGCCG 3'   | 249                 |
| GRMZM2G071042 | F: 5' CCACCCAGACCAAACCCAG 3'<br>R: 5' GGAGACTGCCGAGGAGGAAT 3'         | 255                 |
| GRMZM2G409893 | F: 5' TTTTGTGCTGGGGAAGAGTGGG 3'<br>R: 5' CAACCAGGTTTACCATGAATTGCT 3'  | 265                 |
| GRMZM2G083935 | F: 5' TCCACGCTGGAGAGTATTTGCG 3'<br>R: 5' TGTCTACGTTGCGCATAGACCG 3'    | 268                 |
