# Supplementary material for: Gene Expression and Chromatin Modifications Associated with Maize Centromeres
Source: Oxford University Press journal article supplement (doi:10.1534/g3.115.022764), 2015-12-03
Supplement: 022764_tables2.pdf [file 022764_tables2.pdf]

**Table S2.** Summary of ChIP-seq and input libraries and mapping of sequence reads to B73 genome

| <b>Library</b> | <b>Total read pairs</b> | <b>Read pairs passed quality control</b> | <b>Mappable read pairs</b> | <b>Uniquely mapped read pairs (%)<sup>1</sup></b> | <b>Centromeric read pairs (%)<sup>2</sup></b> |
|----------------|-------------------------|------------------------------------------|----------------------------|---------------------------------------------------|-----------------------------------------------|
| 0.2U Input     | 35,366,518              | 34,282,260                               | 33,568,066                 | 16,854,486<br>(50.2%)                             | 86,937<br>(0.5%)                              |
| 0.2U ChIP      | 28,053,990              | 20,594,145                               | 18,375,337                 | 6,929,280<br>(37.7%)                              | 1,575,470<br>(22.7%)                          |
| 5U Input       | 40,687,077              | 39,209,656                               | 38,610,100                 | 19,128,781<br>(49.5%)                             | 84,051<br>(0.4%)                              |
| 5U ChIP        | 37,563,852              | 36,085,722                               | 35,124,707                 | 15,072,393<br>(42.9%)                             | 1,662,475<br>(11.0%)                          |

<sup>1</sup> The percentage of uniquely mapped read pairs of total mapped read pairs.

<sup>2</sup> The percentage of centromeric read pairs of uniquely mapped read pairs.
