# Supplementary material for: Gene Expression and Chromatin Modifications Associated with Maize Centromeres
Source: Oxford University Press journal article supplement (doi:10.1534/g3.115.022764), 2015-12-03
Supplement: 022764_tables3.pdf [file 022764_tables3.pdf]

**Table S3.** Summary of CENH3-binding domains in maize centromeres.

| chr   | 0.2U ChIP |           |          | 5U ChIP   |           |          |
|-------|-----------|-----------|----------|-----------|-----------|----------|
|       | start     | end       | score    | start     | end       | score    |
| chr1  | 134564000 | 134963999 | 17.33723 | 134689000 | 134838999 | 9.21308  |
| chr2  | 93376000  | 95366999  | 47.32126 | 93488000  | 95309999  | 29.39275 |
| chr3  | 85440000  | 85620999  | 22.05455 | 85513000  | 85620999  | 12.93867 |
| chr3  | 99795000  | 100840999 | 56.18643 | 99795000  | 100791999 | 19.32957 |
| chr4  | 103592000 | 104000999 | 24.84698 | 103606000 | 103920999 | 20.87898 |
| chr4  | 105361000 | 106416999 | 43.00696 | 105361000 | 106292999 | 27.13909 |
| chr5  | 97859000  | 97915999  | 80.42664 | 97859000  | 97907999  | 69.64549 |
| chr5  | 102074000 | 104265999 | 41.55917 | 102178000 | 104061999 | 29.21828 |
| chr6  | 39144000  | 39306999  | 59.13685 | 39148000  | 39306999  | 44.24974 |
| chr6  | 49795000  | 49951999  | 6.956058 | 49837000  | 49992999  | 5.732896 |
| chr7  | 22729000  | 23225999  | 156.5513 | 22729000  | 23225999  | 59.92748 |
| chr7  | 25844000  | 25879999  | 58.64455 | 25844000  | 25879999  | 35.46663 |
| chr7  | 54564000  | 54884999  | 15.58001 | 54818000  | 54869999  | 10.37664 |
| chr7  | 60433000  | 60544999  | 45.3855  | 0         | 0         | 0        |
| chr7  | 62351000  | 62438999  | 17.41533 | 62365000  | 62438999  | 12.2381  |
| chr8  | 47395000  | 47464999  | 6.391546 | 0         | 0         | 0        |
| chr8  | 48171000  | 48280999  | 11.992   | 48153000  | 48273999  | 6.713015 |
| chr8  | 48814000  | 50271999  | 118.43   | 49065000  | 50948999  | 53.29545 |
| chr8  | 50372000  | 51024999  | 46.87439 | 0         | 0         | 0        |
| chr9  | 52374000  | 53786999  | 44.63877 | 52425000  | 53682999  | 29.68458 |
| chr9  | 54058000  | 54271999  | 18.46935 | 54058000  | 54210999  | 10.64905 |
| chr9  | 55946000  | 56037999  | 13.45925 | 0         | 0         | 0        |
| chr9  | 73221000  | 73533999  | 19.16575 | 0         | 0         | 0        |
| chr10 | 2000      | 500999    | 80.47098 | 2000      | 500999    | 37.13952 |
| chr10 | 50084000  | 51888999  | 44.78818 | 50155000  | 51803999  | 29.16889 |
