# Supplementary material for: Gene Expression and Chromatin Modifications Associated with Maize Centromeres
Source: Oxford University Press journal article supplement (doi:10.1534/g3.115.022764), 2015-12-03
Supplement: 022764_tables4.pdf [file 022764_tables4.pdf]

**Table S4.** Genes identified in maize centromeres.

| <b>Gene</b>      | <b>FPKM<br/>root</b> | <b>FPKM<br/>shoot</b> | <b>Annotation</b> | <b><i>Cen</i></b> | <b>Start</b> | <b>End</b> | <b>Location</b> |
|------------------|----------------------|-----------------------|-------------------|-------------------|--------------|------------|-----------------|
| GRMZM2G170586    | 35.99                | 19.03                 | protein_coding    | 2                 | 94266077     | 94267223   | CENH3 depleted  |
| GRMZM2G175425    | 35.93                | 1.11                  | protein_coding    | 5                 | 102484601    | 102485399  | CENH3 depleted  |
| GRMZM2G038950    | 19.18                | 14.52                 | protein_coding    | 10                | 51460608     | 51469271   | CENH3 depleted  |
| GRMZM2G040843    | 9.86                 | 22.83                 | protein_coding    | 10                | 300326       | 310785     | CENH3 depleted  |
| GRMZM2G101098    | 22.64                | 6.06                  | low_confidence    | 10                | 51689475     | 51694380   | CENH3 depleted  |
| GRMZM2G071042    | 5.37                 | 13.67                 | protein_coding    | 4                 | 105880601    | 105881362  | CENH3 depleted  |
| GRMZM5G846522    | 11.5                 | 6.33                  | low_confidence    | 10                | 51790128     | 51793293   | CENH3 depleted  |
| GRMZM2G409893    | 8.31                 | 5.71                  | protein_coding    | 3                 | 100262600    | 100300288  | CENH3 depleted  |
| GRMZM2G083935    | 9.15                 | 3.02                  | protein_coding    | 2                 | 93759614     | 93761482   | CENH3 depleted  |
| GRMZM2G137715    | 3.51                 | 2.33                  | protein_coding    | 10                | 51010484     | 51019069   | CENH3 depleted  |
| GRMZM5G820434    | 0                    | 5.65                  | low_confidence    | 2                 | 94301768     | 94302100   | CENH3 depleted  |
| GRMZM2G167167    | 1.86                 | 2.63                  | low_confidence    | 8                 | 49256345     | 49258696   | CENH3 depleted  |
| AC200178.2_FG003 | 0                    | 3.02                  | protein_coding    | 2                 | 94558679     | 94559149   | CENH3 depleted  |
| GRMZM2G523064    | 0                    | 2.34                  | low_confidence    | 10                | 50951271     | 50952535   | CENH3 depleted  |
| GRMZM2G122088    | 1.44                 | 0                     | low_confidence    | 2                 | 94438906     | 94440704   | CENH3 depleted  |
| CUFF.6520        | 0                    | 1.33                  | novel_transcript  | 2                 | 93848741     | 93849516   | CENH3 depleted  |
| GRMZM2G361718    | 1.33                 | 0                     | protein_coding    | 10                | 51456481     | 51458996   | CENH3 depleted  |
| GRMZM2G368486    | 1.08                 | 0                     | protein_coding    | 10                | 50310327     | 50315148   | CENH3 depleted  |
| GRMZM2G326177    | 0                    | 0                     | protein_coding    | 2                 | 93627363     | 93630442   | CENH3 depleted  |
| GRMZM2G038916    | 0                    | 0                     | protein_coding    | 2                 | 94566236     | 94567332   | CENH3 depleted  |
| AC200178.2_FG002 | 0                    | 0                     | protein_coding    | 2                 | 94566238     | 94566768   | CENH3 depleted  |
| GRMZM2G135228    | 0                    | 0                     | protein_coding    | 5                 | 103750694    | 103752458  | CENH3 depleted  |
| AC234517.1_FG005 | 0                    | 0                     | protein_coding    | 8                 | 49642905     | 49645534   | CENH3 depleted  |
| GRMZM5G896790    | 0                    | 0                     | protein_coding    | 8                 | 49714103     | 49714605   | CENH3 depleted  |
| GRMZM2G321072    | 0                    | 0                     | protein_coding    | 8                 | 49868596     | 49870710   | CENH3 depleted  |
| GRMZM2G426703    | 0                    | 0                     | protein_coding    | 8                 | 50174814     | 50175264   | CENH3 depleted  |

|                  |      |   |                |    |           |           |                |
|------------------|------|---|----------------|----|-----------|-----------|----------------|
| GRMZM2G345194    | 0    | 0 | protein_coding | 8  | 50459010  | 50464400  | CENH3 depleted |
| GRMZM2G145909    | 0    | 0 | protein_coding | 10 | 50588819  | 50590827  | CENH3 depleted |
| GRMZM2G180454    | 1.23 | 0 | low_confidence | 10 | 50544569  | 50544978  | CENH3 enriched |
| AC198028.3_FG001 | 1.17 | 0 | low_confidence | 2  | 93991336  | 93991908  | CENH3 enriched |
| GRMZM5G895419    | 0    | 0 | protein_coding | 2  | 93810893  | 93811599  | CENH3 enriched |
| GRMZM2G421160    | 0    | 0 | protein_coding | 2  | 94436682  | 94436885  | CENH3 enriched |
| AC233900.1_FG002 | 0    | 0 | protein_coding | 3  | 99978951  | 99985771  | CENH3 enriched |
| GRMZM2G000411    | 0    | 0 | protein_coding | 5  | 102196478 | 102196962 | CENH3 enriched |
| GRMZM2G426140    | 0    | 0 | protein_coding | 5  | 102549951 | 102556475 | CENH3 occupied |
| GRMZM2G429781    | 0    | 0 | protein_coding | 5  | 102570932 | 102575325 | CENH3 enriched |
| GRMZM2G115127    | 0    | 0 | protein_coding | 5  | 102581188 | 102581854 | CENH3 enriched |
| GRMZM2G701752    | 0    | 0 | protein_coding | 5  | 103419867 | 103420154 | CENH3 enriched |
| AC198230.4_FG003 | 0    | 0 | protein_coding | 8  | 49872505  | 49872997  | CENH3 enriched |
| GRMZM2G100662    | 0    | 0 | protein_coding | 8  | 50755590  | 50755835  | CENH3 enriched |
| GRMZM2G061764    | 0    | 0 | protein_coding | 9  | 52961497  | 52964749  | CENH3 enriched |
| GRMZM2G069264    | 0    | 0 | protein_coding | 10 | 50308455  | 50309427  | CENH3 enriched |
| AC196714.3_FG004 | 0    | 0 | protein_coding | 10 | 50616674  | 50621840  | CENH3 enriched |

---
