# Supplementary material for: Gene Expression and Chromatin Modifications Associated with Maize Centromeres
Source: Oxford University Press journal article supplement (doi:10.1534/g3.115.022764), 2015-12-03
Supplement: 022764_tables5.xlsx [file 022764_tables5.xlsx]

## Sheet: Sheet1
Table S5. Histone modification patterns associated with subdomains in maize centromeres
Centromere	Start	End	Score	Modification	CENH3	Gene	Start	End	Strand	Biotype	FPKM (shoot)	FPKM (root)
2	93759200	93761599	304.75	H3K4me3	CENH3 depleted	GRMZM2G083935	93759614	93761482	-	protein_coding	3.0163	9.14761
2	93759800	93761599	222.285	H3K9ac	CENH3 depleted	GRMZM2G083935	93759614	93761482	-	protein_coding	3.0163	9.14761
2	93840400	93841599	190.492	H3K4me3	CENH3 depleted
2	93840400	93841599	312.912	H3K9ac	CENH3 depleted
2	93840600	93841599	30.2096	H3K36me3	CENH3 depleted
2	93848000	93849199	32.6184	H3K36me3	CENH3 depleted	CUFF.6520	93848741	93849516	.	novel_transcript	1.33171	0
2	93848000	93849199	109.988	H3K4me3	CENH3 depleted	CUFF.6520	93848741	93849516	.	novel_transcript	1.33171	0
2	93848000	93849199	251.01	H3K9ac	CENH3 depleted	CUFF.6520	93848741	93849516		novel_transcript	1.33171	0
2	93990800	93991999	120.837	H3K9ac	CENH3 depleted	AC198028.3_FG001	93991336	93991908	+	low_confidence	0	1.17191
2	93991000	93991999	114.264	H3K4me3	CENH3 occupied	AC198028.3_FG001	93991336	93991908	+	low_confidence	0	1.17191
2	94048200	94048799	40.3374	H3K9ac	CENH3 occupied
2	94265600	94267199	156.062	H3K36me3	CENH3 depleted	GRMZM2G170586	94266077	94267223	-	protein_coding	19.0297	35.9936
2	94265600	94267199	360.66	H3K9ac	CENH3 depleted	GRMZM2G170586	94266077	94267223	-	protein_coding	19.0297	35.9936
2	94266000	94267199	206.952	H3K4me3	CENH3 depleted	GRMZM2G170586	94266077	94267223	-	protein_coding	19.0297	35.9936
2	94301600	94302399	68.4676	H3K4me3	CENH3 depleted	GRMZM5G820434	94301768	94302100	+	low_confidence	5.64569	0
2	94301600	94302399	209.286	H3K9ac	CENH3 depleted	GRMZM5G820434	94301768	94302100	+	low_confidence	5.64569	0
2	94390000	94391599	233.981	H3K4me3	CENH3 depleted	AC191558.3_FG004	94390267	94391398	-	low_confidence
2	94390400	94391599	619.13	H3K9ac	CENH3 depleted	AC191558.3_FG004	94390267	94391398	-	low_confidence
2	94390600	94391399	23.7489	H3K36me3	CENH3 depleted	AC191558.3_FG004	94390267	94391398	-	low_confidence
2	94439600	94440399	75.8012	H3K9ac	CENH3 depleted	GRMZM2G122088	94438906	94440704		low_confidence	0	1.43709
2	94441600	94442999	38.3747	H3K9ac	CENH3 depleted	AC200178.2_FG003	94558679	94559149	-	protein_coding	3.01767	0
2	94558400	94559599	49.9752	H3K4me3	CENH3 depleted	AC200178.2_FG003	94558679	94559149	-	protein_coding	3.01767	0
2	94558600	94559399	101.188	H3K9ac	CENH3 depleted	AC200178.2_FG002	94566238	94566768	-	protein_coding
2	94566200	94567199	45.7711	H3K4me3	CENH3 depleted	GRMZM2G038916	94566236	94567332	+	protein_coding
2	94566200	94567399	91.9452	H3K9ac	CENH3 depleted	GRMZM2G038916	94566236	94567332	+	protein_coding
3	100265400	100290399	2262.45	H3K36me3	CENH3 depleted	GRMZM2G409893	100262600	100300288	-	protein_coding	5.70808	8.30717
3	100296200	100300399	443.404	H3K36me3	CENH3 depleted	GRMZM2G409893	100262600	100300288	-	protein_coding	5.70808	8.30717
3	100298400	100300399	295.8	H3K9ac	CENH3 depleted	GRMZM2G409893	100262600	100300288	-	protein_coding	5.70808	8.30717
3	100298800	100300399	211.303	H3K4me3	CENH3 depleted	GRMZM2G409893	100262600	100300288	-	protein_coding	5.70808	8.30717
3	100599400	100599999	51.7214	H3K9ac	CENH3 occupied
4	105880200	105881799	184.08	H3K4me3	CENH3 depleted	GRMZM2G071042	105880601	105881362	+	protein_coding	13.6676	0
4	105880600	105881399	32.1096	H3K36me3	CENH3 depleted	GRMZM2G071042	105880601	105881362	+	protein_coding	13.6676	0
4	105880600	105882199	287.079	H3K9ac	CENH3 depleted	GRMZM2G071042	105880601	105881362	+	protein_coding	13.6676	0
4	106067000	106067999	71.3879	H3K4me3	CENH3 depleted	GRMZM2G178750	106067346	106067722	-	low_confidence
4	106067000	106067999	116.269	H3K9ac	CENH3 depleted	GRMZM2G178750	106067346	106067722	-	low_confidence
4	106168000	106169199	28.8468	H3K9ac	CENH3 depleted
5	102306600	102307399	202.126	H3K9ac	CENH3 depleted
5	102306800	102307399	128.679	H3K4me3	CENH3 depleted
5	102482800	102486599	82.7243	H3K27me3	CENH3 depleted	GRMZM2G175425	102484601	102485399	+	protein_coding	1.10749	35.9257
5	102484400	102486199	45.3364	H3K4me3	CENH3 depleted	GRMZM2G175425	102484601	102485399	+	protein_coding	1.10749	35.9257
5	103751600	103752599	51.0327	H3K4me3	CENH3 depleted	GRMZM2G135228	103750694	103752458	-	protein_coding
5	103751600	103752599	252.453	H3K9ac	CENH3 depleted	GRMZM2G135228	103750694	103752458	-	protein_coding
8	50582800	50583399	37.7397	H3K4me3	CENH3 occupied	AC205573.3_FG002	50583066	50583383	-	low_confidence
8	50583000	50583399	43.7305	H3K9ac	CENH3 occupied	AC205573.3_FG002	50583066	50583383	-	low_confidence
9	52961000	52963599	51.7357	H3K27me3	unmappable	GRMZM2G061764	52961497	52964749	-	protein_coding
9	52961200	52964799	150.396	H3K4me3	unmappable	GRMZM2G061764	52961497	52964749	-	protein_coding
10	302600	310799	616.717	H3K36me3	CENH3 depleted	GRMZM2G040843	300326	310785	-	protein_coding	22.8259	9.85866
10	308000	310999	158.305	H3K4me3	CENH3 depleted	GRMZM2G040843	300326	310785	-	protein_coding	22.8259	9.85866
10	309800	310799	203.982	H3K9ac	CENH3 depleted	GRMZM2G040843	300326	310785	-	protein_coding	22.8259	9.85866
10	50589200	50590999	98.3353	H3K4me3	CENH3 depleted	GRMZM2G145909	50588819	50590827	-	protein_coding
10	50590000	50590799	38.8284	H3K9ac	unmappable	GRMZM2G145909	50588819	50590827	-	protein_coding
10	50714400	50715799	25.3941	H3K9ac	CENH3 occupied
10	50922600	50923799	30.0399	H3K9ac	CENH3 occupied	AC195988.2_FG001	50921271	50923437	-	low_confidence
10	51014800	51018999	290.265	H3K36me3	CENH3 depleted	GRMZM2G137715	51010484	51019069	-	protein_coding	2.32523	3.508
10	51017400	51019199	176.48	H3K9ac	CENH3 depleted	GRMZM2G137715	51010484	51019069	-	protein_coding	2.32523	3.508
10	51017800	51018999	123.934	H3K4me3	CENH3 depleted	GRMZM2G137715	51010484	51019069	-	protein_coding	2.32523	3.508
10	51457600	51459599	27.2183	H3K4me3	CENH3 depleted	GRMZM2G361718	51456481	51458996	-	protein_coding	0	1.3265
10	51462000	51467199	305.618	H3K36me3	CENH3 depleted	GRMZM2G038950	51460608	51469271	-	protein_coding	14.5169	19.1814
10	51465400	51466399	23.6304	H3K4me3	CENH3 depleted	GRMZM2G038950	51460608	51469271	-	protein_coding	14.5169	19.1814
10	51689800	51698399	383.651	H3K36me3	CENH3 depleted	GRMZM2G101098	51689475	51694380	-	low_confidence	6.06203	22.6386
10	51702400	51703599	98.0452	H3K36me3	CENH3 depleted	GRMZM2G582306	51703498	51703582	-	low_confidence
10	51789200	51793399	481.116	H3K36me3	CENH3 depleted	GRMZM5G846522	51790128	51793293	-	low_confidence	6.32803	0
10	51791200	51793399	121.845	H3K4me3	CENH3 depleted	GRMZM5G846522	51790128	51793293	-	low_confidence	6.32803	0
10	51791600	51793399	273.823	H3K9ac	CENH3 depleted	GRMZM5G846522	51790128	51793293	-	low_confidence	6.32803	0
